# Supplementary material for: Sediment microbial taxonomic and functional diversity in a natural salinity gradient challenge Remane’s “species minimum” concept
Source: PeerJ. 2017 Oct 13;5:e3687. doi: 10.7717/peerj.3687 (PMC5642246; doi:10.7717/peerj.3687)
Supplement: Table S4 — R, River; L, Lagoon; S, Sea; AR, Arachthos; ARO, Arachthos Neochori; ARDelta, Arachthos Delta; LOin, Logarou station inside the lagoon; LOout, Logarou station in the channel connecting the lagoon to the gulf; Kal, Kalamitsi; A, B, C, replicate samples. [file peerj-05-3687-s008.xlsx]

## Sheet: Φύλλο1
Supplementary Table 4: The retrieved KEGG metabolic profiles for each sample. R: River. L: Lagoon. S: Sea. AR: Arachthos. ARO: Arachthos Neochori. ARDelta: Arachthos Delta. LOin: Logarou station inside the lagoon. LOout: Logarou station in the channel connecting the lagoon to the gulf. Kal: Kalamitsi. A, B, C: replicate samples.
	R_AR_A	R_AR_Β	R_AR_C	R_ARO_A	R_ARO_Β	R_ARO_C	R_ARDelta_A	R_ARDelta_Β	R_ARDelta_C	L_LOin_A	L_LOin_B	L_LOin_C	L_LOout_A	L_LOout_B	L_LOout_C	S_Kal_A	S_Kal_B	S_Kal_C
K00936; [EC:2.7.3.-]	0.0106252177205318	0.00972850865742037	0.00812186745253458	0.0110101680489329	0.0106768415900369	0.0109888797961744	0.0111979158245044	0.0107305206182807	0.0109148263985621	0.0101440287982403	0.00971836758801815	0.00996798933341181	0.00952654982547387	0.0101814318672198	0.0100232530167343	0.00959838582658817	0.00982160683876286	0.00992490732890836
K03296; hydrophobic/amphiphilic exporter-1 (mainly G- bacteria), HAE1 family	0.00491559275290014	0.00464370299649958	0.00476266968287705	0.00418544641161552	0.00444559539461172	0.00437415757071077	0.00440277868191543	0.00452228406684482	0.00464584684310581	0.00450943632878464	0.00476872913989625	0.00474446505892737	0.0044470312271478	0.00471976640215311	0.0047955222364472	0.00448569601699311	0.00490747745218533	0.00482938371175814
K06147; ATP-binding cassette, subfamily B, bacterial	0.00434140925371169	0.00471887555474588	0.00466086171594468	0.00501105701558733	0.00471759234704218	0.00480521769852059	0.00356998607297869	0.00366206217727678	0.00350211508553537	0.0044994900362744	0.00428656820319091	0.00437371497780327	0.00506716482158343	0.00405099788049358	0.00410765359777571	0.00556260723239185	0.00453273987091754	0.00473823768920063
K03406; methyl-accepting chemotaxis protein	0.00518337536412896	0.00433895711203877	0.0036268539670122	0.00475800650439581	0.00451294415876348	0.00443017115783299	0.00468841202870354	0.00514885353098365	0.00476278394533704	0.00403797498888667	0.00387879881149991	0.00382548871733087	0.00318059266593898	0.00478693327806419	0.00424212162483339	0.00278360830771155	0.00378900727221598	0.00360426436457383
K02014; iron complex outermembrane recepter protein	0.00550799095596795	0.00510502577224884	0.00705309984388006	0.00432693147822413	0.00476488061342419	0.00465586377151247	0.00299670681577449	0.00333407045824782	0.00302195120927797	0.00348898097594982	0.004494462316636	0.00431079595457954	0.0051501089361524	0.00386007846098213	0.00408857063765865	0.00299454577853762	0.00292359953822791	0.002837282992335
K00059; 3-oxoacyl-[acyl-carrier protein] reductase [EC:1.1.1.100]	0.00470573442626654	0.00476066749063719	0.00574632615873107	0.00373404209125155	0.00369868952563585	0.00378378536690555	0.00268209929173598	0.00264878323544106	0.00271339862596939	0.00329839891883215	0.00363556984160549	0.00348004629332489	0.00372662511022422	0.00316070019022205	0.00345936941787996	0.00444470725417531	0.0041164383447422	0.00410138565425585
K02003; putative ABC transport system ATP-binding protein	0.00356646803141002	0.00359336737703452	0.00369568285930741	0.00354712990830758	0.00336500890969555	0.00337784998967784	0.00292439490640735	0.00300262705065186	0.00294670109256199	0.00339116268118086	0.00350817208554287	0.00344910196549304	0.00380492702961462	0.00329965802032988	0.00345835772629888	0.0037882211337002	0.00358341674274995	0.00361305337899567
K02004; putative ABC transport system permease protein	0.00410930414010391	0.00385048694448401	0.00436603805399001	0.00340619182760373	0.00330154936047499	0.00336882615747707	0.00247732097220527	0.00251710283692323	0.00245385592532637	0.00330541095323578	0.00401389067095314	0.00385305572408479	0.00473412724846293	0.00318642734811086	0.00365751935717302	0.00270239356396935	0.00282154970809452	0.00267083621311323
K02481; two-component system, NtrC family, response regulator	0.00342963432942109	0.0027156520613045	0.0020155085004964	0.0028684070649703	0.00325407718757056	0.00326186943837875	0.00392299244833638	0.00369398028987969	0.00405313530662164	0.00301961030725905	0.00283465098935673	0.00285618222023496	0.00200175304559824	0.00297748014146401	0.0029081181174784	0.00138972931622243	0.00259820821447131	0.00238466004986383
K09687; antibiotic transport system ATP-binding protein	0.00300749887401761	0.00293564941809223	0.00317586080497713	0.00281455124843835	0.00279667587414605	0.0027771785593592	0.00319654859398586	0.00284953842541233	0.00298923870893534	0.00289808433895052	0.00290077681715789	0.00284118581938419	0.00305858416208313	0.00276751865566462	0.0028256834589566	0.00267416045930945	0.00271366312199555	0.00268237192103168
K08884; serine/threonine protein kinase, bacterial [EC:2.7.11.1]	0.0033757218086351	0.00362872565056329	0.0036359290412836	0.00268507200612208	0.00252346935933518	0.00272993297081907	0.00167538523692216	0.00181456424248153	0.00172086917627692	0.00304790604394566	0.00306135603719141	0.00317352250067085	0.00249345984223217	0.00215354398155479	0.00267944016702559	0.00359400850279336	0.00328819959274989	0.00321691818011685
K00540; [EC:1.-.-.-]	0.003027505461546	0.0032877306595568	0.00350751748698156	0.00299856651248176	0.00289691454410158	0.00293827108868138	0.00212471426227943	0.00216554188042404	0.0021944068274368	0.00268088000910632	0.00276967261640467	0.00274708543724507	0.00278121854170457	0.00262227908716528	0.00273088421538317	0.00291858106906336	0.00275655990709442	0.00276491248756754
K02584; Nif-specific regulatory protein	0.00313662574828932	0.00248743600255838	0.00188385661597447	0.00268071677527141	0.00309064113778847	0.00307639230960257	0.0037992162870557	0.00356048467790735	0.00394143625603769	0.0028450322689953	0.00261944004656995	0.0026372169916955	0.00185351685858495	0.00286009867837489	0.00269424957243054	0.00130735364103802	0.00244107033498583	0.00224459397740399
K01897; long-chain acyl-CoA synthetase [EC:6.2.1.3]	0.00262936505370277	0.00260158295896765	0.00265577761861429	0.00273488102884724	0.00293327296621463	0.00292261652235217	0.00322515567800522	0.00310396379442105	0.003383199743309	0.00261781059010277	0.00260040698496126	0.00257076779715102	0.00260762019301059	0.00278781319508375	0.00278189431476411	0.0019965756538406	0.00235721235101087	0.00228890688363912
K07712; two-component system, NtrC family, nitrogen regulation response regulator GlnG	0.00315038005494501	0.00253662928144659	0.00195137986424862	0.00268148462350075	0.00307639807662627	0.00306887216638496	0.00354673036193839	0.00335250542166478	0.00365659807473043	0.00278117913387199	0.00262936820898845	0.0026387592075277	0.00189934535311096	0.00279044363573619	0.00270360070547999	0.00143327288668667	0.00248053384769083	0.00229344271577697
K02049; NitT/TauT family transport system ATP-binding protein	0.00265075267867782	0.00279831798971109	0.00285748135258757	0.00269456026164782	0.00248284165763521	0.00248596850520478	0.00207089738359824	0.00201127516614335	0.00208345694660131	0.00256516760561382	0.00263672555268281	0.00257940956020286	0.0028494210065917	0.0024707606608712	0.00253385463274366	0.00338688223452893	0.00294269127110272	0.00304496125193227
K01533; Cu2+-exporting ATPase [EC:3.6.3.4]	0.00222961559809279	0.00228807686041617	0.00233796676466182	0.00238587194775895	0.00243019042480624	0.0024215009967082	0.00248854736553838	0.00251493150145436	0.00245059098243077	0.00257537686778972	0.0027005778536771	0.00271268743149079	0.00301902471495121	0.0027005364420287	0.00274749920266793	0.00233849194894104	0.00226036302259956	0.00229847296608415
K01990; ABC-2 type transport system ATP-binding protein	0.00233466462610154	0.00232312841329524	0.00244473092468657	0.0022771768194398	0.00222647696249396	0.00221238811148764	0.00262881356877105	0.00250871910706776	0.00258680002729668	0.00250650429217727	0.00251663473150678	0.00250736695050264	0.00264461552831487	0.00235844721516677	0.00247472623805854	0.00238246021414933	0.00239812180809843	0.00237595758666466
K02032; peptide/nickel transport system ATP-binding protein	0.00251294289710556	0.002595320597837	0.002914902170833	0.00238416589737361	0.00224524987187855	0.00223486872344756	0.0016783436260795	0.001757159079728	0.00175013064268484	0.00223995798693818	0.0023107534756367	0.00218451103807166	0.00274903192492595	0.002152531561481	0.00231668820964154	0.00307064981547789	0.00263177194939804	0.00272815661659705
K02488; two-component system, cell cycle response regulator	0.0022182167922263	0.0020683341796249	0.00170739423714703	0.00252692169426003	0.00243413753443961	0.00245960916497405	0.00240298791046937	0.00278258558346845	0.00256263097516853	0.00246271689610715	0.00227602605343213	0.0023152649008771	0.00196563312166552	0.00289910775683038	0.00257886589145064	0.00206677769912336	0.00229582744311901	0.00231878886726595
K13924; two-component system, chemotaxis family, CheB/CheR fusion protein [EC:2.1.1.80 3.1.1.61]	0.00214141504796424	0.00207454406023401	0.00186624712136039	0.00225774755462945	0.00220531960440313	0.0022309727828268	0.00213067829425448	0.00261687202733393	0.00231892872558891	0.00243426780325365	0.00247468552622306	0.002482562773454	0.00242444036974366	0.00286558645301138	0.00283770142262086	0.00205173205384537	0.00228187535417855	0.00228398259784636
K03320; ammonium transporter, Amt family	0.00204183957842824	0.00208190390499585	0.0018118758917849	0.00229403819922552	0.00222061658305865	0.00225065780521768	0.00210395406126558	0.0024104316866452	0.00223334081818507	0.0024434456796481	0.00231319528071185	0.00237567586123511	0.00220050693462034	0.00277289471510928	0.00264355736195695	0.00217000203867552	0.00228647239910541	0.00230058238269422
K02667; two-component system, NtrC family, response regulator PilR	0.00262251418083974	0.00206984073173027	0.00149947345927134	0.00232204806312403	0.00267438354298882	0.00265690445489677	0.00313860184839886	0.00290175915346068	0.00323883422452746	0.00237318372890429	0.00218747364676021	0.00220204977523676	0.00152687279177319	0.00241320396897639	0.00223904109701071	0.0010546089212177	0.00198399598492763	0.00182503888923773
K10126; two-component system, NtrC family, C4-dicarboxylate transport response regulator DctD	0.00253971896480322	0.00206647194476713	0.00166999737876477	0.0021943514136232	0.00248724879910489	0.00248895461068833	0.00287811270054626	0.00265388766003095	0.00297645283513272	0.0022979087006529	0.00219345553519785	0.00217794487414636	0.00161958862963113	0.0023959319782534	0.00224569732029345	0.00117380387087726	0.00203339704812083	0.00187260786897187
K02035; peptide/nickel transport system substrate-binding protein	0.00239449900849561	0.00243658336074449	0.00288123547880045	0.00217314181723981	0.00202171811637942	0.0020039602773268	0.00147008857631115	0.00144315173373741	0.00139795923073192	0.00193895610674221	0.00200196954491325	0.00184393343626523	0.00248358884695125	0.00191879525390197	0.00197700534931913	0.00299661481552981	0.0024885172373953	0.00256089874467007
K03701; excinuclease ABC subunit A	0.00204123703929901	0.00202549448766376	0.00204373608714278	0.00191743230960273	0.00202962722684913	0.00202198794750154	0.00213580829585521	0.00216696898397106	0.00213023022828307	0.00226171331472108	0.00239266802818752	0.00241149299754434	0.00222034343702388	0.00214244435107014	0.00227022490437983	0.00190796633680662	0.00208288973144095	0.00202364811097693
K07636; two-component system, OmpR family, phosphate regulon sensor histidine kinase PhoR [EC:2.7.13.3]	0.00206037255254164	0.00188141515219822	0.00168474964342784	0.00223854099824075	0.00237090620903837	0.0023639209616276	0.00271582515824654	0.0023952401181278	0.00243485337498264	0.00199597161395893	0.00197430058477377	0.00198661997423705	0.00216019695704106	0.00203429588655214	0.00198946507293706	0.0016784021312142	0.00170599157283124	0.00172454757754723
K03657; DNA helicase II / ATP-dependent DNA helicase PcrA [EC:3.6.4.12]	0.00192427825988962	0.00196526477654814	0.0019225193802451	0.00200681533066004	0.00209094402456738	0.00208390628947356	0.00214807582582031	0.00227875983106098	0.00216634623933548	0.00209462960972956	0.00207805518371343	0.00208286733224372	0.00215613386110125	0.00209569226650076	0.00214490041741391	0.00199375522023797	0.00201833418937667	0.00202369081088441
K02013; iron complex transport system ATP-binding protein [EC:3.6.3.34]	0.00234419555038687	0.00229438893446544	0.00243346766861719	0.00210877073077129	0.00197903159886998	0.00199382801285356	0.00194498681533762	0.00193811114242856	0.00189543571706348	0.0020156270893399	0.00203800683699367	0.00202223208541125	0.00206203983616773	0.00192983824603035	0.00198759882055198	0.00210356881356896	0.00206390085692442	0.00205107874788932
K03088; RNA polymerase sigma-70 factor, ECF subfamily	0.00276450751184256	0.00266743506646339	0.00328390362789404	0.00195368822142561	0.0020579564215658	0.00209519062535312	0.00154066057304487	0.00131855785107477	0.00132812245310464	0.00192156420146183	0.00239581120569666	0.00225490622383168	0.00251309885907129	0.00177586715873031	0.00209707850707062	0.00174289592891569	0.0017961916115762	0.00168580241786779
K03695; ATP-dependent Clp protease ATP-binding subunit ClpB	0.0017606610703578	0.0019085809553643	0.00172853288065969	0.00207807454662998	0.00200587011010898	0.00203213227838056	0.00254592284713932	0.00237026617415463	0.0023176294423027	0.00222014129210626	0.0019475508407521	0.00206464652287749	0.00198835679648798	0.00191004884672706	0.00188965579593251	0.0021340112757818	0.00186508893883205	0.00194361310347923
K03046; DNA-directed RNA polymerase subunit beta' [EC:2.7.7.6]	0.00166972038655962	0.00179848030199617	0.00165273141780989	0.00189739449259485	0.00189776594567792	0.00191731919133216	0.0023405809413156	0.0023622858553275	0.002287663240367	0.00218590477706662	0.00201254232375202	0.00210168874451689	0.00201970533402752	0.00204242912078054	0.00200198870956878	0.00207231676834144	0.00193008302324764	0.00198982274117525
K01153; type I restriction enzyme, R subunit [EC:3.1.21.3]	0.00159812352050751	0.00159125427232419	0.00150876305804195	0.00163119281073976	0.00164511292983075	0.00166163120229646	0.00249673090333515	0.00245313713796899	0.00242057138902774	0.00207048943752352	0.0022180788607258	0.00223838888811446	0.00204573139353728	0.00222004346663441	0.00212394576715528	0.00145459861752375	0.00183719813242618	0.0017614932372254
K02483; two-component system, OmpR family, response regulator	0.00201744179786954	0.00199652429859113	0.00203166862901062	0.00221246210504121	0.00214536005484979	0.00216338067132167	0.00199709890878763	0.00198203634008993	0.00193937471176547	0.00183706382038056	0.00168689796264306	0.00168798335709042	0.00194382579773622	0.00184947249950599	0.00183887739915995	0.00186888319981109	0.00174668436465482	0.00178057087455929
K07714; two-component system, NtrC family, response regulator AtoC	0.00231085718842616	0.00178493464469679	0.00126877224369885	0.00194175398380026	0.00227034963488738	0.00225659685535347	0.00286728555936019	0.00265727851037668	0.00291693333822273	0.00195115382925553	0.00174800603890892	0.00177293606590915	0.00124368085943447	0.00187760825325739	0.00180935385926446	0.000842841822485636	0.00163763128038612	0.00150899772243097
K06158; ATP-binding cassette, subfamily F, member 3	0.00200922423046823	0.00194313063723999	0.00197253156674391	0.0018038709763717	0.00178313502183803	0.0018108384653407	0.00186587038084968	0.00193256854824429	0.0017953964375865	0.00187214703808139	0.00199941628196786	0.00202301295931907	0.00212701264624406	0.00181809744159201	0.00207158022569329	0.00184463538989856	0.00185460288405798	0.00185888564805846
K03696; ATP-dependent Clp protease ATP-binding subunit ClpC	0.00160308077955954	0.00177325930829422	0.00155577359010043	0.00201053323425951	0.00194265061311703	0.00196661219712671	0.00243001496957832	0.00221772332708105	0.00219073320323562	0.00211389818562969	0.00181166355877398	0.00194053522609741	0.00185326722149922	0.00177367449355885	0.00170906184746277	0.00199989112566661	0.0016934020614148	0.00176903047196147
K00257; [EC:1.3.99.-]	0.00240785754869419	0.00241941690203205	0.00296345529222424	0.00183646264211555	0.00195860908700551	0.00199742619817283	0.00193365680991223	0.00172276223462861	0.00200165899779846	0.00150882715229792	0.00163799678927504	0.00157217407866608	0.00163189442275617	0.00158442593259279	0.00165668415425179	0.00164534638436405	0.00181909993474883	0.00174031396540893
K03407; two-component system, chemotaxis family, sensor kinase CheA [EC:2.7.13.3]	0.00217885818029862	0.00193480938395182	0.0016897613140749	0.00211558104963889	0.0020741142232598	0.00209410648642899	0.00210678122710591	0.00215450819507978	0.00211343744154871	0.00186970584458001	0.00176842232704504	0.00178287841080451	0.00144926853870659	0.00203207017955642	0.00188559182956886	0.00130008242793358	0.00166963416226593	0.00161457499662475
K02006; cobalt/nickel transport system ATP-binding protein	0.00177891566791604	0.0018225533487446	0.00179827239323798	0.00208581239818747	0.00198114355345942	0.00195251877641695	0.00197202099194075	0.00187367632345618	0.00184356275699518	0.00190734544821836	0.00176658496970965	0.00179099407696193	0.00206304651505256	0.00190255680951151	0.00174489336773595	0.0019144294288403	0.00171007185202843	0.00176265587420931
K02337; DNA polymerase III subunit alpha [EC:2.7.7.7]	0.00157485389036871	0.00160219806070605	0.0014970507502046	0.00169379425586691	0.00178927792876043	0.00179066509329932	0.00233294438884472	0.00222312678153911	0.00221260610722222	0.00192214349827779	0.0018804543145301	0.00194017494819898	0.00191120525132374	0.00183911204146855	0.00187372974215888	0.00171872449372324	0.00169652650758331	0.00172882556485595
K13599; two-component system, NtrC family, nitrogen regulation response regulator NtrX	0.00213994428479459	0.0017229772706321	0.00141253574425431	0.00182534554829475	0.00210565776682028	0.00209191264919934	0.00245543909915958	0.0022862597804228	0.0025346433618764	0.0018398602716229	0.00172806320005701	0.00172268355611602	0.00128382401758963	0.00186449371442058	0.00175905418459462	0.00102796770402564	0.00170141857487566	0.00157538349113614
K07713; two-component system, NtrC family, response regulator HydG	0.00211726210890414	0.00167787861374818	0.00122002298562984	0.00181705115050999	0.00213409792729465	0.00213369903067696	0.00259777173916306	0.00239946300403067	0.00264465790027143	0.00187690640042204	0.0017572297920892	0.00177519993545497	0.00126030976095276	0.00184758689222362	0.00179622289909328	0.000847169711058961	0.00158363541857305	0.00145385342338929
K02519; translation initiation factor IF-2	0.00179034702286749	0.00182911299324068	0.00184644671592224	0.00165653201070383	0.00168347812071256	0.00170239841025563	0.001916520922609	0.00189127807129729	0.00187118064287653	0.00187588898911602	0.00187203366464604	0.0019053179167034	0.00182827912094573	0.00178183340995341	0.00189163252185646	0.00175096660387721	0.00180358317534464	0.00178364890516952
K01362; [EC:3.4.21.-]	0.00171181191725886	0.00179894036821745	0.00176368202061315	0.00164488738765698	0.00171091289648016	0.00171272651552527	0.00153729955097921	0.0015177563239697	0.00154801352939093	0.00197223733653048	0.0020528936332811	0.00203818751383444	0.00184449624453526	0.00174765138999532	0.00184692456136659	0.00204892166963596	0.00204275927750163	0.00200142038899315
K15738; ATP-binding cassette, subfamily F, uup	0.00197526352351847	0.00194014947037037	0.00197670958563263	0.00170908604887012	0.00163409435823879	0.00168401998706453	0.00170671799102037	0.00177994704552825	0.00160491137012588	0.00175362785007375	0.00184757612945714	0.00187290969553549	0.00198535350873905	0.00163924266389794	0.00190851302192952	0.00181774836971094	0.00176315910168531	0.00178656054674721
K00666; fatty-acyl-CoA synthase [EC:6.2.1.-]	0.00207335391076962	0.00209276512053396	0.00234638678059027	0.00180240741854739	0.00182131624666676	0.00186964448239725	0.00182125797778279	0.00171438435595135	0.00200234140605213	0.00158239396708996	0.00163036388258289	0.00158029912327644	0.00162239133895879	0.00169349256568051	0.00173311690865855	0.00134530201000172	0.00160017182191027	0.00153645979928509
K02031; peptide/nickel transport system ATP-binding protein	0.00193012826409502	0.00197551296492242	0.00226838753585464	0.00174806126058261	0.00166472408349096	0.00164294466657111	0.00125752993420157	0.00128510720247163	0.00128415387748223	0.00166153089352787	0.001748267060647	0.00162093793929824	0.00204255178805259	0.00164598750475813	0.00175349945393947	0.00228207820058721	0.0019839619807218	0.00203872775753409
K03043; DNA-directed RNA polymerase subunit beta [EC:2.7.7.6]	0.0015783872756313	0.0015833628211886	0.00156144484664694	0.00159713110331474	0.00162651969431453	0.00162538210576789	0.00211537001508901	0.00212122808337022	0.00208533787257513	0.00181566251236201	0.00176885773585412	0.0017941214230939	0.00178271652721532	0.00181821192011522	0.00180118646818364	0.00167617341935536	0.00170800711257923	0.00172990439382623
K00128; aldehyde dehydrogenase (NAD+) [EC:1.2.1.3]	0.00224331544109083	0.00232657628361884	0.00285334579654164	0.00157373261410433	0.0015434308634175	0.0015773814899822	0.000901726214040085	0.00097138109312507	0.000903854081241811	0.00138824776468027	0.00161749568296217	0.00153717430506852	0.00172666915571783	0.00127626958222383	0.00148681190138894	0.00249159993589698	0.00215167691519521	0.00216364834156776
K15726; cobalt-zinc-cadmium resistance protein CzcA	0.0019921978910004	0.00185040057304398	0.00208072329145659	0.00162689412864352	0.00178232507529635	0.0017374969169773	0.00135897773581592	0.00144178336046379	0.00141207374570514	0.00164163762086089	0.00196550952371505	0.00195364426242487	0.00205801435287528	0.00186886909632477	0.00186410925949253	0.00118195575709675	0.00144845552455779	0.00137760777828408
K01995; branched-chain amino acid transport system ATP-binding protein	0.001712978186614	0.00177648986450254	0.00185909226800388	0.00182795924920228	0.00169037702900621	0.00166879578784226	0.00166229187002159	0.00153654943680498	0.00165805888655562	0.00162367883738567	0.00155891109734579	0.00152156415389744	0.00165218968535964	0.00158954949565235	0.00152022777453901	0.00196920611537775	0.00181061234222628	0.00183875240743274
K01895; acetyl-CoA synthetase [EC:6.2.1.1]	0.00161522567237684	0.00163780041380071	0.00171813659516601	0.00166739760471488	0.00165603883013166	0.00161713171293306	0.00193818441203783	0.00186133793988097	0.00194537387438804	0.00169957111769761	0.00159558187175262	0.00158514327251571	0.0016321227416938	0.00171228601426584	0.00169323981885219	0.00157638550203499	0.00165507309894152	0.00162635648062401
K02028; polar amino acid transport system ATP-binding protein [EC:3.6.3.21]	0.00173445970425079	0.00178278757639196	0.0018218241723231	0.00175015406566588	0.00162335655551837	0.00162555322393716	0.00147033841019499	0.00147346327037831	0.00143519182994254	0.00156871079888119	0.00157395240873146	0.00154439687092911	0.00179049172614719	0.00153541272594219	0.00159408333548471	0.00215170691134805	0.00188734995565361	0.00194315862819296
K07715; two-component system, NtrC family, response regulator GlrR	0.00199877491090336	0.00159099020901311	0.00117951964387556	0.0016925182811891	0.00190174005103697	0.00190637414498691	0.0022176220341664	0.0020666607798592	0.00230224657879093	0.0017304608398847	0.00161455176221999	0.00163366967892275	0.00113693861413426	0.00175071182093503	0.00164488151281807	0.00082668994241555	0.0015262433330439	0.0014037773396255
K02355; elongation factor G	0.00157848946657844	0.00152933149127732	0.00136498709114261	0.00167033390581889	0.00167882083053172	0.00168597829162161	0.00216066208161918	0.00200484847966166	0.0020373013926563	0.00170618398479333	0.00156770867912419	0.00161537172260825	0.00153102222206046	0.00161829604956142	0.00158265707453518	0.00151819089643021	0.00152102493050769	0.00154921721619493
K12266; anaerobic nitric oxide reductase transcription regulator	0.00194138171625972	0.00155485975180315	0.00117025185174258	0.00164517143139621	0.0018933384672035	0.00190429378963663	0.00226347018200458	0.0021098118915905	0.00232987651342206	0.00171674788014635	0.00159789485449142	0.00161111732903171	0.00110880961905752	0.00171317543755549	0.00164699587829653	0.000799805885538021	0.00149645804177539	0.0013682265913417
K02010; iron(III) transport system ATP-binding protein [EC:3.6.3.30]	0.00173212381644646	0.00184486600368071	0.00192880252229988	0.00167381102036437	0.00156449762225586	0.00156161610534773	0.00106970792127851	0.00110813526373103	0.00111602270590916	0.00156366418797769	0.00164334352689954	0.00159815658526432	0.00190587879067861	0.00146153685854194	0.00161214850141781	0.00238404665890857	0.00199520214669781	0.00208503436601385
K10943; two component system, response regulator FlrC	0.00184957922693708	0.00147866770664224	0.00111650896666417	0.00160319940262757	0.00183676887732459	0.00181078575648534	0.00234012663771445	0.00215419807119204	0.00244815414367533	0.00174834574394605	0.00156738154573858	0.0015787491526436	0.0010500404104184	0.00177325305054844	0.00161410839014338	0.000767655535038873	0.00149151040925762	0.00136414968384548
K11085; ATP-binding cassette, subfamily B, bacterial MsbA [EC:3.6.3.-]	0.00156864576078929	0.001551412146548	0.00156572724910232	0.00165739426835586	0.00165271165002103	0.00165912161394853	0.00157821580572691	0.00165655560166044	0.0016254946312958	0.001642721545275	0.00169918999254995	0.00169876931626696	0.00186658824069479	0.00165274665014164	0.00170470756580396	0.00159556834112894	0.00155243753592828	0.00157402425035978
K01955; carbamoyl-phosphate synthase large subunit [EC:6.3.5.5]	0.00146600473185655	0.0014712694399426	0.00138110372229853	0.00151708271981176	0.00153894533035301	0.00153726364984567	0.00203605471163261	0.00202203138201437	0.00199747712581648	0.00169515129014161	0.00157621212738939	0.00163028560993967	0.00151699072357175	0.00158619830907759	0.00161642572547976	0.00160300028503555	0.00164332944138457	0.00165352482319033
K01996; branched-chain amino acid transport system ATP-binding protein	0.00162375389619014	0.00170047372389962	0.00180088653294698	0.00163710823956937	0.00151993867040862	0.00150875104098081	0.00154526363762655	0.00145077802626331	0.0015281939522088	0.00154712758020943	0.00152832517953542	0.0015042876396306	0.00167946075022326	0.0015024272900442	0.00151071468238019	0.00184812860274798	0.00170418732170672	0.00172696727894745
K00382; dihydrolipoamide dehydrogenase [EC:1.8.1.4]	0.00149932851314138	0.00153305131080431	0.00158801092047698	0.00147154119486233	0.00155068618669407	0.00153836028677364	0.00162223740107397	0.00157345085919854	0.00156999055188865	0.00157959409033634	0.0016493048612646	0.00163789243450351	0.00163404620260909	0.00168144736079955	0.0016204710027223	0.00159222118137188	0.00159491273469551	0.00159672850415792
K00123; formate dehydrogenase, alpha subunit [EC:1.2.1.2]	0.00163750519089546	0.00142690882398862	0.0013540373285449	0.00169846397569091	0.00166696525290775	0.00157325848906402	0.00266350495152107	0.00237681782896983	0.00241940242591826	0.00139550937116849	0.0012657211003063	0.00125313998030162	0.00131339638520737	0.00149010848302454	0.00150585268723157	0.000927174716665418	0.00129588761212178	0.00125309445123583
K03723; transcription-repair coupling factor (superfamily II helicase) [EC:3.6.4.-]	0.00139633417225215	0.0014513031339876	0.00138527980754418	0.00147914694738465	0.00148021397698306	0.00148510586176715	0.00177012765633553	0.00177086422222854	0.00176048056908902	0.00168777412676645	0.00160406386831098	0.00165335281738854	0.00158685512610772	0.00159495912776203	0.00159111035017059	0.00160570364984486	0.00154574856839817	0.00158458360861101
K02482; two-component system, NtrC family, sensor kinase [EC:2.7.13.3]	0.00191356953753975	0.00148291164673649	0.00115626975797124	0.00162930356231659	0.00160886471852722	0.00170145739586877	0.00256160119645765	0.00216920580562187	0.00246417210969386	0.00149931015603157	0.0013048759357153	0.00135240097365967	0.000952539174916748	0.00146701158929787	0.00145155135607824	0.000807603103368853	0.00140019951617635	0.00130660108875561
K00627; pyruvate dehydrogenase E2 component (dihydrolipoamide acetyltransferase) [EC:2.3.1.12]	0.00180680918065116	0.00181175256240939	0.00203098920939267	0.00157236241418563	0.00156066817861597	0.0015648118710616	0.00118029860991538	0.00122715829070088	0.00124613768359075	0.00150665102871089	0.00160108111368158	0.00156333411967651	0.00156055507814982	0.00155664294268043	0.00158626955458906	0.00153320520081781	0.00158157289081627	0.00155071861348256
K01338; ATP-dependent Lon protease [EC:3.4.21.53]	0.00174335344098775	0.00145297722399214	0.00142757039388051	0.00152662824110636	0.00156598477751146	0.00150940281324912	0.00210319514372197	0.00203324822916329	0.00211068719861296	0.00147369324068553	0.00141291377901099	0.00140252169155356	0.0014348133281933	0.00162537679914165	0.0015347986017568	0.000974443011717167	0.00132073068647357	0.00129143070279494
K02469; DNA gyrase subunit A [EC:5.99.1.3]	0.00126491735235525	0.00140950144502264	0.00129480772881688	0.00149949602582631	0.00143630726965439	0.00145790177589997	0.00161545907997167	0.00161314874033927	0.00160781154340188	0.00174053369735142	0.0015991919601707	0.00167380354538708	0.00154500888503609	0.00158342103768512	0.00154719242013284	0.00174428655377584	0.00158493845339827	0.00163723952559849
K01952; phosphoribosylformylglycinamidine synthase [EC:6.3.5.3]	0.00134246204644684	0.00137613477556503	0.00129888676609332	0.00138585316661923	0.00140072955888168	0.00139113546139261	0.00183294784774319	0.00179666837507144	0.00181214029811248	0.00162039948870168	0.00156785332651748	0.00159847756081298	0.00151391776413744	0.00160138769010316	0.0015737047534704	0.00148348829879113	0.00154120250614187	0.00154641646502913
K03798; cell division protease FtsH [EC:3.4.24.-]	0.0011784189945145	0.00144787013807085	0.00106983903011525	0.00164217991452002	0.0014693824750405	0.00151852010693854	0.00149200376822116	0.00157834251779909	0.00143665868653828	0.00181842588600527	0.0014854219232872	0.00166124645562705	0.00142667710259653	0.00138663000443327	0.00140845100565466	0.00192148344684783	0.00159229202835141	0.00166343904126482
K00265; glutamate synthase (NADPH/NADH) large chain [EC:1.4.1.13 1.4.1.14]	0.00157100722389176	0.00163265598793913	0.00159141178612147	0.00148192616670087	0.00133652663278748	0.00139307430997726	0.00110566878160356	0.00136130254894151	0.00114471204523435	0.00159368649099305	0.00163906663250735	0.0017077616535764	0.00167021091858274	0.00141114398665211	0.0016360378574532	0.0016883899646776	0.00153101167461796	0.00159158920013776
K00525; ribonucleoside-diphosphate reductase alpha chain [EC:1.17.4.1]	0.00140338567849034	0.00134243859159029	0.00147632155647927	0.00125281814501026	0.00136597689704473	0.00130896790282018	0.00179056999721454	0.00172056675880366	0.00174208850869183	0.00142075382283718	0.0014984493053175	0.00142108197596991	0.00139484533892356	0.00163691032507999	0.00149566260957366	0.00140752733416983	0.00158423692689611	0.00154476477051345
K03086; RNA polymerase primary sigma factor	0.00133191369474333	0.0014917266020157	0.0013123115781639	0.00148921522567141	0.00137471463388542	0.00140601650153061	0.00138687707294719	0.00141750797744535	0.00141181701223883	0.00169939945500973	0.00154728280111715	0.00164675154847167	0.00130120834013358	0.00137534417150601	0.00143882341929305	0.00172306492856635	0.00158604456058095	0.0016093792101618
K00548; 5-methyltetrahydrofolate--homocysteine methyltransferase [EC:2.1.1.13]	0.00139678907919437	0.00145954767516645	0.00135822150757754	0.00156382721385379	0.0016608658247352	0.00164658418882408	0.00134710708422085	0.00148181300136963	0.00131391965557665	0.0015104977875308	0.00143957639884827	0.0014828625763773	0.00150691325773309	0.00145390834848356	0.00143156839335982	0.00151073415395136	0.00140893937153556	0.00141320566366548
K01130; arylsulfatase [EC:3.1.6.1]	0.00119887774909414	0.00151411668276163	0.00165447606876979	0.000647106081227116	0.000731710436559676	0.000807134521471083	0.000664669254438739	0.000797920739554383	0.00072851245765724	0.0018897131042845	0.00237676556240601	0.00230009044955486	0.00188794358861011	0.00122565532913833	0.00201760050980078	0.00197507288652881	0.00202572230890409	0.00189988582799473
K01870; isoleucyl-tRNA synthetase [EC:6.1.1.5]	0.00124623411850178	0.00129489431146795	0.00126308231605275	0.00134355238242991	0.00135717285800001	0.00134114381631556	0.00171020765771557	0.00168777440540684	0.00164437455915099	0.0015101283969226	0.00143259166966685	0.00146536863537954	0.00147202997758269	0.00147073756719269	0.00144043634860075	0.00143677628397633	0.00141936589959642	0.00142981093806961
K00626; acetyl-CoA C-acetyltransferase [EC:2.3.1.9]	0.00163144248759523	0.00161655680266998	0.00194931634377122	0.00138809733322122	0.00138933230133918	0.00140574158635496	0.00147616021855611	0.00136071989713247	0.00162719379628166	0.00130655101211872	0.00136627578089498	0.00133298387677697	0.00131969878344157	0.00142941976374644	0.00138690295769092	0.00117689665290282	0.0014109541973722	0.00133974889817374
K01873; valyl-tRNA synthetase [EC:6.1.1.9]	0.00122352255110435	0.00126736200742477	0.0011956570252674	0.001358746048894	0.00135978502592539	0.00134673654621724	0.00169336096968047	0.00167231855558469	0.00164822072383605	0.00150655064861868	0.00142701547823485	0.00146686296922139	0.00143559697420042	0.00150484984005926	0.00142013632454212	0.00145164204494207	0.00143343363844282	0.00144647919775356
K03529; chromosome segregation protein	0.00127073990619722	0.00136554625182974	0.00126027717013004	0.00145611484048527	0.00147907803350533	0.00146677828015251	0.00123291914218779	0.00125617946745991	0.00135146271011533	0.00162159413580207	0.00157122630450528	0.00161423368092116	0.00140334598931691	0.00154334108552004	0.00141719940893814	0.00152471962920122	0.0015140831287907	0.00148404462756214
K02056; simple sugar transport system ATP-binding protein [EC:3.6.3.17]	0.0016627119885629	0.00163064796376735	0.00199814834711064	0.00150968435852296	0.00139308624290555	0.00135339782388383	0.000831161682578629	0.000851604193560358	0.000821677291230547	0.00125446498566078	0.00131929172719336	0.00118845528228803	0.00175688904872506	0.00122429090521078	0.00128036668720392	0.00208828316146334	0.00172684396306853	0.00179835838745166
K05366; penicillin-binding protein 1A [EC:2.4.1.- 3.4.-.-]	0.00146831397288929	0.00145278467225894	0.00156122497992168	0.00137607954553639	0.00136033804642688	0.00133045890801928	0.00136884763068121	0.00139484329228824	0.00151418028657752	0.00140864375438884	0.00133444574188014	0.00135217321374103	0.00148480416221132	0.00133121341338039	0.001357961854853	0.00156533994753457	0.0014937129655302	0.00152049853459142
K13590; diguanylate cyclase	0.00129870099084287	0.00119989706142528	0.00110529909460832	0.00143049978189471	0.00142871046924315	0.00141685514701384	0.00146134464777192	0.00170794079353583	0.00158312852799653	0.00151130974472999	0.00145331584413529	0.00144867848634859	0.00119617663884653	0.00190044071191047	0.00168878740148655	0.00104532438679212	0.0013612249314049	0.00132111073569081
K03070; preprotein translocase subunit SecA	0.00123210782771101	0.00129008299961171	0.00121097398600559	0.0012921512321305	0.00131124450384038	0.0013239885541022	0.00165808288793434	0.00162951764660452	0.00160020297009072	0.0015108203376636	0.00146991461233002	0.00151290737912471	0.00141768008770851	0.00138990912392133	0.00144380322920855	0.0013892817855564	0.00138161417335114	0.00139548629446402
K00249; acyl-CoA dehydrogenase [EC:1.3.8.7]	0.00183076119736868	0.00179326109309744	0.00225332802066547	0.00143625085601481	0.0015527237376097	0.00157241632909052	0.00150652122149309	0.00133244584880535	0.00155319378453317	0.00109483805446718	0.0011037055165926	0.00104697518359071	0.00110236787976288	0.0011340728121438	0.00115486847373563	0.0012726582631945	0.00136683526095741	0.00131858256650975
K07486; transposase	0.000707043708918639	0.000670649535648382	0.000720536641174594	0.000519148140473782	0.000557281129218768	0.000528941888953624	0.00184857491806551	0.00182105827652492	0.00240636231928537	0.00168532813908487	0.00195594460149989	0.00184572084261846	0.00139581170945871	0.00217311707297083	0.00184742599854547	0.00116343385034434	0.00176092366273652	0.00166509451989905
K01999; branched-chain amino acid transport system substrate-binding protein	0.00151441529612961	0.00156453974286658	0.00153950888772782	0.00174409508652993	0.00156167308320332	0.00152869478937106	0.00124973525540274	0.00112568017785719	0.00126668684745888	0.00116703705414465	0.000998153920999931	0.000968607161665388	0.0011653771421142	0.00119156210930711	0.0010150830427339	0.00176911685392415	0.00157618552335934	0.00160705081094095
K03797; carboxyl-terminal processing protease [EC:3.4.21.102]	0.0012242999492146	0.00127314233447942	0.00116693419541842	0.00126122514160327	0.00136858356432778	0.00138113692476151	0.00137411028650673	0.00141090033210309	0.00130303231234618	0.00145320479215972	0.00146930050147831	0.0015291788932305	0.00146064621321163	0.00127367668874343	0.00135046897505231	0.00135249789047641	0.0012118361549458	0.00123505517555741
K02470; DNA gyrase subunit B [EC:5.99.1.3]	0.0011529626224276	0.00118194061064495	0.00121366471916235	0.00115803610767305	0.00117708344760632	0.00117144227770548	0.00142065689275499	0.00142789237025698	0.00145763456119641	0.00138657185550114	0.00142179436189259	0.00141414631625887	0.00139875355253562	0.00144963542095083	0.00141904025975202	0.00135056973729745	0.00138199367764298	0.00139479967694382
K02052; putative spermidine/putrescine transport system ATP-binding protein	0.00145911568526849	0.00154630677284527	0.00169793824915391	0.0013567787913728	0.00126582990488258	0.00125990756229431	0.000825847430881959	0.000833388527441448	0.000833020849924993	0.00118748536253187	0.00128093872054138	0.00119809894054556	0.00152831957441099	0.00115061161184875	0.0012490709769412	0.00192904789085304	0.00161360625040193	0.00167859672048962
K03168; DNA topoisomerase I [EC:5.99.1.2]	0.00123106120207898	0.00130563634010896	0.00132361132701177	0.00121146701362075	0.00121328088464336	0.00121101236736753	0.00134279260304871	0.00136327577248517	0.00130486678299758	0.00139176503944722	0.0013425386815089	0.00139599997785789	0.00128062061908964	0.00126688199374766	0.00129887730462955	0.00151630959463825	0.00142562561413122	0.00143964946688966
K01953; asparagine synthase (glutamine-hydrolysing) [EC:6.3.5.4]	0.00104204008020031	0.00103096713010598	0.000974668397516305	0.00112537820989543	0.00124890744511221	0.0012251969211219	0.00144192950170382	0.00150666529828505	0.0015600753458316	0.00147292342589175	0.00152400480351939	0.00151164025007562	0.00132279347499153	0.00159158500718716	0.00147955081737734	0.00108679983853654	0.00135355928341748	0.00130909194627262
K07814; putative two-component system response regulator	0.00134225899102009	0.00115916819733831	0.000912391339694271	0.00161498487043261	0.00153380323724792	0.0015177932098706	0.00174764377833262	0.00172262107459575	0.00174317564679627	0.00133462552556851	0.00113950369334469	0.00116709556442762	0.00107515299525515	0.00146696028331219	0.00122544384401636	0.000863739284697678	0.00106481759968662	0.00106036494054451
K01537; Ca2+-transporting ATPase [EC:3.6.3.8]	0.00101101422823515	0.000996023048886795	0.000829591621148098	0.00143125404977521	0.00141449468032838	0.00135801939298721	0.0017917535646986	0.00183397902635937	0.00174040322970687	0.00137186458307125	0.00118968462926963	0.00119799350409032	0.00146050465896885	0.00157149733530671	0.00134207991330525	0.000990663808419316	0.0010031120179672	0.00105898516210281
K01869; leucyl-tRNA synthetase [EC:6.1.1.4]	0.00112272135994889	0.00116140373395781	0.00111985612527781	0.00123558260182262	0.0012587750811131	0.00124358845427886	0.00155924618449285	0.0015205016465015	0.0014876256689613	0.00134806671911616	0.00127932399026456	0.00130987748421637	0.00130544793255963	0.00133574819532929	0.00128018657251487	0.001310882617327	0.00129165466861662	0.0013035507262055
K04043; molecular chaperone DnaK	0.00117344736661626	0.00135187704293216	0.00124367934880055	0.00137784379029331	0.00127909045152325	0.00130224240379812	0.00127036307455969	0.00126283629766173	0.00124977310234419	0.00142280110542937	0.00127134839268006	0.0013440407193964	0.00121505789705913	0.00124826789711153	0.00119772506880457	0.00151496737411884	0.00134112345649949	0.0013914336751773
K08300; ribonuclease E [EC:3.1.26.12]	0.00141645237949712	0.00146869108079561	0.0015402182961902	0.00125036109694711	0.00119890932069587	0.00123804500698491	0.000984416209261933	0.000976617026184131	0.00106572309480723	0.00138125852377364	0.00140473219941687	0.0014067039197306	0.00110508739466194	0.00131210288203018	0.00130121095301518	0.00143992007586627	0.00145214945009166	0.001428698012003
K03694; ATP-dependent Clp protease ATP-binding subunit ClpA	0.00109159872205505	0.00114124357328488	0.00113364521719116	0.00122262418790418	0.00123436531766266	0.0012191443618833	0.00149439138197283	0.00149498736149552	0.00149229073879123	0.00138830760888225	0.0013096101153993	0.00133434499251027	0.00132103071488096	0.00131239270313462	0.00129526192092669	0.00130859002238846	0.00124017878494878	0.00126614600467127
K00615; transketolase [EC:2.2.1.1]	0.00119183934097358	0.00116631486763244	0.0010884835830273	0.00122665556044939	0.00135474221328188	0.00132628645019169	0.00161500405137552	0.00159911854936817	0.00160398604664176	0.00130068866763815	0.00119962377987139	0.00121307409173887	0.00115869963096042	0.00129945893755897	0.00119325464072902	0.00120165351172639	0.0012536996629002	0.00125504517715844
K03721; transcriptional regulator of aroF, aroG, tyrA and aromatic amino acid transport	0.00152968757809145	0.00120370520143977	0.000862065262081391	0.00127391745854369	0.00150738067186043	0.00149626328674418	0.00182774564442809	0.00169579232618633	0.00185503405068792	0.0013211737505614	0.0012264676607868	0.00123527766956303	0.00087093776810589	0.00130603669972194	0.00125832238061379	0.000592159928809255	0.00113525306502094	0.00104273374322149
