# Supplementary material for: Sediment microbial taxonomic and functional diversity in a natural salinity gradient challenge Remane’s “species minimum” concept
Source: PeerJ. 2017 Oct 13;5:e3687. doi: 10.7717/peerj.3687 (PMC5642246; doi:10.7717/peerj.3687)
Supplement: Table S6 — R, River; L, Lagoon; S, Sea; AR, Arachthos; ARO, Arachthos Neochori; ARDelta, Arachthos Delta; LOin, Logarou station inside the lagoon; LOout, Logarou station in the channel connecting the lagoon to the gulf; Kal, Kalamitsi; A, B, C, replicate samples; Chl-a, Chlorophyll-a concentration (ug/l) and Fluorescence; O2, Oxygen concentration; Chl-a sediment, Chlorophyll-a concentration in the sediment (ug/g); CPE, Chloroplastic pigment equivalents; POC, Particulate Organic Carbon; silt & clay, percentage of silt and clay; sand, percentage of sand. [file peerj-05-3687-s010.xlsx]

## Sheet: Φύλλο1
Supplementary Table 6: The values of the physicochemical variables of the sampling stations. R: River. L: Lagoon. S: Sea. AR: Arachthos. ARO: Arachthos Neochori. ARDelta: Arachthos Delta. LOin: Logarou station inside the lagoon. LOout: Logarou station in the channel connecting the lagoon to the gulf. Kal: Kalamitsi. A, B, C: replicate samples. Chl-a: Chlorophyll-a concentration (ug/l) and Fluores…
		R_AR_A	R_AR_B	R_AR_C	R_ARO_A	R_ARO_B	R_ARO_C	R_ARDelta_A	R_ARDelta_B	R_ARDelta_C	L_LOin_A	L_LOin_B	L_LOin_C	L_LOout_A	L_LOout_B	L_LOout_C	S_Kal_A	S_Kal_B	S_Kal_C
Water	Chl-a	0.433466	0.4845	0.44897	0.415378	0.38114	0.34884	1,0997 *	1,0997 *	1,0997 *	1.1473	1.24118	1.37555	2.94576	2.26961	5.47377	0,9948 *	0,9948 *	0,9948 *
	Salinity (psu)	0.2	0.2	0.2	0.2	0.2	0.2	36.4692	36.4692	36.4692	27.8	27.8	27.8	30.1	30.1	30.1	38.8228	38.8228	38.8228
	O2 (mg/l)	10.24	10.24	10.24	9.99	9.99	9.99	0.2448	0.2448	0.2448	8.42	8.42	8.42	8.42	8.42	8.42	6.8088	6.8088	6.8088
	Temperature (oC)	14.1	14.1	14.1	14.9	14.9	14.9	19.064	19.064	19.064	11.1	11.1	11.1	14.2	14.2	14.2	19.7704	19.7704	19.7704
Sediment	Chl-a sediment	1.10833	0.96687	1.27362	2.13169	4.32681	3.59644	1.74604	2.84942	1.73897	6.74208	10.4442	7.45991	24.4783	27.4268	20.1558	4.50371	1.85508	2.12871
	Phaeopigments (ug/g)	2.0615	1.52798	0.215826	1.51058	4.75025	3.00621	22.6714	25.9168	17.4413	8.99409	13.9795	9.97546	45.23	47.9593	30.1087	2.41189	1.84033	1.76038
	CPE (ug/g)	3.16983	2.49485	1.48944	3.64227	9.07706	6.60264	24.4175	28.7662	19.1803	15.7362	24.4238	17.4354	69.7082	75.386	50.2645	6.9156	3.69541	3.88909
	POC (ug/g)	11296.8	11684.2	9624.62	2329.75	13879.4	5443.71	23453.4	24319.1	20854.9	21320.3	27952.9	19118	32996	34621.3	24653.5	3855.69	5492.96	5954.2
	silt & clay	21.3227	21.3227	21.3227	0.853789	0.853789	0.853789	1.56147	1.56147	1.56147	3.2944	3.2944	3.2944	1.68379	1.68379	1.68379	1.52378	1.52378	1.52378
	sand	78.6773	78.6773	78.6773	99.1462	99.1462	99.1462	98.4385	98.4385	98.4385	96.7056	96.7056	96.7056	98.3162	98.3162	98.3162	98.4762	98.4762	98.4762
	Depth (m)	1.5	1.5	1.5	0.5	0.5	0.5	20	20	20	0.5	0.5	0.5	0.7	0.7	0.7	40	40	40
	Sampling Date	2014-11-28	2014-11-28	2014-11-28	2014-11-28	2014-11-28	2014-11-28	2014-12-08	2014-12-08	2014-12-08	2014-11-27	2014-11-27	2014-11-27	2014-11-27	2014-11-27	2014-11-27	2014-12-08	2014-12-08	2014-12-08
* Fluorescence values were regarded as a proxy for chlorophyll-a concentration
